# Supplementary material for: Impact of Postoperative Chemoradiotherapy versus Chemotherapy Alone on Recurrence and Survival in Patients with Stage II and III Upper Rectal Cancer: A Propensity Score-Matched Analysis
Source: PLoS One. 2015 Apr 22;10(4):e0123657. doi: 10.1371/journal.pone.0123657 (PMC4406553; doi:10.1371/journal.pone.0123657)
Supplement: S1 Dataset — (XLSX) [file pone.0123657.s001.xlsx]

## Sheet: original data
id	Surgeon	SEX	AGE	Stoma	CEA_pre	CEA5_pre	CEA_post	CEA5_post	GROSS	ulceroin	T_border	SIZE	Tstage	POS_LN	RES_LN	LN_ratio	N_stage_5gp	PD	closeRM	LVI	NER_INV	St_rxn	PORT	total dose	Chemo	LRR	LRRdur	DM	DMdur	RFS	RFSdur	OS	OSdur
1	1	2	69	0	2.4	0	2.1	0	3	1	2	8.3	5	14	24	0.583	4	1	0	1	1	0	0		2	1	6	1	3.9	1	3.9	1	9.2
2	1	2	65	0	2.1	0	0.9	0	3	1	2	5.5	4	7	19	0.368	4	0	0	1	1	0	0		0	1	18.2	1	32.2	1	18.2	1	52.1
3	1	1	46	0	8.7	1	1.2	0	3	1	2	7	4	0	22	0	0	0	1	0	1	1	0		0	1	12.9	0	35.3	1	12.9	1	35.3
4	1	2	73	0	4.7	0	2.2	0	2	0	1	7.5	4	2	27	0.074	2	0	1	1	0	0	0		2	1	28.7	1	28.7	1	28.7	1	51.8
5	1	2	53	1	4.5	0	0.9	0	2	0	2	4.2	4	5	25	0.2	3	0	0	1	1	0	0		2	1	18.9	1	5.3	1	5.3	1	41.3
6	1	1	51	0	1.2	0	1.2	0	2	0	2	7.3	4	21	29	0.724	4	1	1	1	1	0	0		2	1	9.9	1	9.9	1	9.9	1	17.1
7	1	1	80	0	122.3	1	0.9	0	2	0	2	10	5	11	21	0.524	4	0	1	1	1	0	0		2	1	3.5	1	3.5	1	3.5	1	15.4
8	1	2	80	0	1.4	0	0.8	0	3	1	2	5	5	4	31	0.129	3	1	0	1	1	0	0		2	1	3.4	1	3.4	1	3.4	1	3.8
9	1	1	54	0	3.5	0	1	0	3	1	2	7	4	18	25	0.72	4	1	0	1	0	1	0		2	1	4.8	1	3.4	1	3.4	1	5.3
10	1	1	71	1	6.6	1	2.7	0	3	1	2	6	4	10	51	0.196	4	1	0	1	1	2	0		2	0	23.6	1	23.6	1	23.6	1	37.3
11	1	1	69	1	7.4	1	2	0	1	0	2	12	5	0	103	0	0	0	0	0	0	0	0		2	0	41.4	0	41.4	0	36.9	0	41.4
12	2	2	55	0	28.4	1	7.8	1	3	1	2	7.5	5	4	52	0.077	3	0	0	1	0	0	0		2	0	41.1	0	41.1	0	41.1	0	41.1
13	2	2	64	0	60.6	1	1.4	0	2	0	2	6.5	5	24	37	0.649	4	0	0	1	0	0	0		2	0	56	0	56	0	56	0	59.4
14	1	1	67	0	19	1	0.9	0	3	1	2	5	4	7	31	0.226	4	0	0	1	0	1	0		2	0	84.2	0	84.2	0	84.2	0	84.2
15	1	1	50	0	7.7	1	0.9	0	2	0	2	5.5	4	0	39	0	0	0	0	0	1	1	0		2	0	78.7	0	78.7	0	78.7	0	78.7
16	2	1	81	0	86.4	1	1.8	0	2	0	2	6	3	7	119	0.059	4	0	1	1	1	2	0		0	0	21.6	1	5.8	1	5.8	1	22.3
17	1	1	67	0	1.7	0	3.2	0	2	0	2	3.5	3	2	24	0.083	2	0	0	1	1	0	0		2	0	42.9	0	42.9	0	42.9	0	42.9
18	1	1	54	0	2.9	0	2.9	0	1	0	2	2.5	3	0	37	0	0	0	0	0	0	2	0		2	0	54.4	1	40	1	40	0	54.4
19	2	2	80	0	6.6	1	5.5	1	3	1	2	4.8	3	2	22	0.091	2	0	0	0	0	0	0		2	0	26.7	1	22.5	1	22.5	1	26.7
20	2	1	72	1	5.3	1	3.3	0	2	0	1	5.5	3	0	17	0	0	0	0	1	0	1	0		2	0	40.2	1	25.9	1	25.9	1	40.2
21	1	1	62	0	4.3	0	0.9	0	2	0	1	4	3	0	18	0	0	0	0	0	0	2	0		2	0	74.2	0	74.2	0	74.2	0	74.2
22	1	2	69	0	0.9	0	0.9	0	3	1	2	4.2	3	5	53	0.094	3	0	0	1	0	0	0		2	0	40.6	1	39.1	1	39.1	0	77.2
23	2	1	71	0	4.2	0	4.2	0	2	0	2	4	3	9	26	0.346	4	0	0	1	1	0	0		2	0	11.4	1	9.4	1	9.4	1	11.4
24	1	1	53	0	0.9	0	1	0	3	1	2	4.8	3	4	28	0.143	3	0	0	0	1	0	0		2	0	73.8	1	26.2	1	26.2	0	73.8
25	1	1	68	0	0.9	0	0.9	0	2	0	2	3	3	0	39	0	0	0	0	0	0	2	0		2	0	59.3	1	12.9	1	12.9	0	71.8
26	1	1	60	0	9.7	1	0.9	0	2	0	2	6.5	3	2	41	0.049	2	0	0	1	0	1	0		2	0	83.8	1	21.9	1	21.9	0	83.8
27	1	2	69	0	4.5	0	0.9	0	2	0	2	5	3	1	22	0.045	1	0	0	1	0	1	0		2	0	22.4	1	18.9	1	18.9	0	84.5
28	1	2	69	0	2.3	0	0.9	0	2	0	2	5.5	3	12	37	0.324	4	0	0	1	1	0	0		2	0	58.4	1	29.4	1	29.4	1	58.4
29	1	2	48	0	11.5	1	0.9	0	2	0	2	3.5	3	0	26	0	0	0	0	1	1	1	0		2	0	30.4	1	29.9	1	30.4	0	110.2
30	1	1	73	0	4.6	0	0.9	0	2	0	2	4.3	3	30	46	0.652	4	0	0	1	1	1	0		2	0	16.7	1	6.2	1	6.2	0	89
31	1	2	68	0	215	1	3.2	0	2	0	1	6	3	10	20	0.5	4	0	0	1	1	0	0		2	0	32.5	1	13	1	13	1	32.5
32	1	1	48	0	2.5	0	1.1	0	3	1	2	7	3	8	15	0.533	4	0	0	1	0	0	0		2	0	18.5	1	11	1	11	1	18.5
33	1	2	63	0	15.7	1	0.9	0	2	0	2	6.3	3	0	29	0	0	0	0	1	0	0	0		0	0	37.1	0	37.1	0	37.1	0	38.5
34	1	2	50	0	0.9	0	0.6	0	2	0	1	2.2	3	1	28	0.036	1	0	0	0	0	2	0		2	0	40.2	0	40.2	0	40.2	0	41.2
35	1	2	70	1	11.7	1	2.6	0	3	1	1	9	3	0	26	0	0	0	0	0	0	2	0		0	0	39.6	0	39.6	0	39.6	0	39.4
36	1	2	56	1	0.9	0	0.9	0	2	0	2	3.3	3	0	38	0	0	0	0	0	0	0	0		2	0	41.1	0	41.1	0	41.1	0	41.1
37	1	2	66	0	1.1	0	0.9	0	2	0	2	4.5	3	2	41	0.049	2	0	0	0	0	1	0		2	0	42.2	0	42.2	0	42.2	0	43.9
38	2	1	84	1	1.6	0	0.8	0	2	0	1	4	3	0	42	0	0	0	0	0	0	0	0		0	0	38.5	0	38.5	0	38.5	0	38.5
39	2	1	76	0	2.4	0	1.8	0	1	0	1	5.7	3	0	64	0	0	0	0	0	0	0	0		2	0	38.2	0	38.2	0	38.2	0	38.2
40	1	1	56	0	1.9	0	0.9	0	2	0	2	3.5	3	2	42	0.048	2	0	0	1	1	1	0		0	0	40	0	40	0	40	0	40
41	1	1	69	0	1	0	2.9	0	3	1	2	4	3	0	35	0	0	0	0	0	0	0	0		0	0	46.7	0	46.7	0	46.7	0	46.3
42	2	1	69	0	1.7	0	0.9	0	1	0	2	1.5	3	0	22	0	0	0	0	1	0	0	0		2	0	36.6	0	36.6	0	36.6	0	36.6
43	1	2	41	1	2.2	0	1.4	0	2	0	2	2.5	3	0	46	0	0	0	0	1	0	0	0		2	0	39.3	0	39.3	0	39.3	0	39.3
44	1	2	77	0	2.5	0	2.5	0	2	0	2	4.8	3	0	33	0	0	0	0	0	0	0	0		0	0	49.5	0	49.5	0	49.5	0	49.5
45	1	2	60	1	7.9	1	1.4	0	3	1	2	5.5	3	16	54	0.296	4	0	0	1	1	1	0		2	0	46.2	0	46.2	0	46.2	0	46.2
46	1	1	53	0	0.9	0	0.3	0	2	0	2	2.7	3	0	36	0	0	0	0	0	0	0	0		0	0	47.8	0	47.8	0	47.8	0	47.8
47	1	2	71	1	3.7	0	0.9	0	2	0	2	3.7	3	0	31	0	0	0	0	0	0	0	0		2	0	37.8	0	37.8	0	37.8	0	38.6
48	1	1	70	1	2.6	0	2.1	0	2	0	1	7	3	0	75	0	0	0	0	0	0	0	0		2	0	20.3	0	20.3	0	20.3	0	35.6
49	1	1	71	1	2.6	0	1.4	0	2	0	2	7	3	0	35	0	0	0	0	0	0	1	0		2	0	22.2	0	22.2	0	22.2	0	87.6
50	2	1	82	0	1.7	0	2.1	0	3	1	2	3.5	3	2	22	0.091	2	0	0	0	0	2	0		0	0	67.5	0	67.5	0	67.5	0	67.5
51	1	1	71	0	0.9	0	0.9	0	2	0	1	5	3	1	21	0.048	1	0	0	0	0	2	0		2	0	112.2	0	112.2	0	112.2	0	112.2
52	1	1	83	0	4.62	0	1.2	0	2	0	1	6	3	0	23	0	0	0	0	0	0	0	0		0	0	63.6	0	63.6	0	63.6	0	63.6
53	2	1	70	0	2	0	1.4	0	2	0	1	3.4	3	5	34	0.147	3	0	0	0	0	2	0		2	0	43.5	0	43.5	1	43.5	1	43.5
54	1	1	74	0	5	0	2.7	0	2	0	2	7	3	1	49	0.02	1	0	0	1	0	0	0		2	0	13.1	0	13.1	1	13.1	1	76.1
55	1	2	61	0	3.9	0	4.9	0	3	1	2	4.5	3	1	14	0.071	1	0	0	1	0	1	0		2	0	16.2	0	16.2	1	20.7	1	20.7
56	1	1	67	0	4.8	0	2.7	0	2	0	2	4	3	1	17	0.059	1	0	0	1	0	1	0		0	0	9.6	0	9.6	1	9.6	1	71.1
57	2	1	79	1	10.7	1	1.4	0	3	1	2	7.5	3	1	40	0.025	1	0	0	0	1	0	0		2	0	17.8	0	17.8	0	17.8	0	15
58	1	1	65	0	2.4	0	2.4	0	2	0	2	4.5	3	0	33	0	0	0	0	1	0	0	0		0	0	27.5	0	27.5	0	27.5	0	27.5
59	1	2	69	0	72.4	1	1.8	0	1	0	2	4.2	3	3	16	0.188	2	0	1	1	1	0	0		2	0	46	0	46	0	46	0	46
60	1	1	74	1	0.9	0	0.9	0	1	0	2	4	3	2	64	0.031	2	0	0	0	1	1	0		2	0	31.2	0	31.2	1	31.2	1	33
61	1	1	63	0	2.5	0	2.2	0	1	0	2	10	3	0	34	0	0	0	0	0	0	1	0		2	0	21.3	0	21.3	0	21.3	0	21.3
62	1	1	70	0	6.7	1	3.7	0	3	1	2	3.5	3	2	16	0.125	2	0	0	1	0	1	0		0	0	22.6	0	22.6	0	22.6	0	22.6
63	1	2	65	0	2.1	0	1.5	0	2	0	2	6.5	3	0	32	0	0	0	0	0	0	1	0		0	0	32.2	0	32.2	0	32.2	0	32.2
64	1	1	73	0	1.3	0	0.9	0	2	0	1	7	3	0	28	0	0	0	0	0	0	2	0		2	0	21.7	1	12	1	12	1	21.7
65	1	1	59	0	2.3	0	1.2	0	3	1	2	6	3	1	30	0.033	1	0	0	0	0	0	0		2	0	12.4	0	12.4	0	12.4	0	12.4
66	1	1	63	0	21.1	1	11.2	1	2	0	2	4	3	0	31	0	0	0	0	0	0	1	0		2	0	47.2	0	47.2	0	47.2	0	48
67	1	1	53	0	3.5	0	1.4	0	2	0	2	9	3	3	30	0.1	2	1	0	1	0	0	0		2	0	71.4	0	71.4	0	71.4	0	72
68	2	2	67	1	1	0	1	0	2	0	2	6.5	3	0	26	0	0	0	0	0	0	0	0		2	0	51.5	0	51.5	0	51.5	0	59.4
69	1	1	60	0	1.6	0	1.4	0	2	0	1	6.5	3	0	30	0	0	0	0	1	0	3	0		2	0	46.9	0	46.9	0	46.9	0	46.9
70	1	2	65	0	1.9	0	0.9	0	2	0	2	4.5	3	0	27	0	0	0	0	0	1	2	0		2	0	94.1	0	94.1	0	94.1	0	94.1
71	1	1	67	0	2	0	0.9	0	2	0	1	3.5	3	0	31	0	0	0	0	0	0	0	0		0	0	103.8	0	103.8	0	103.8	0	103.8
72	2	1	59	0	49.7	1	1.2	0	2	0	2	5.4	3	1	19	0.053	1	0	0	0	1	1	0		2	0	49.4	0	49.4	0	49.4	0	57.6
73	1	1	60	0	2	0	1.5	0	2	0	2	5.3	3	0	27	0	0	0	0	0	0	0	0		2	0	44.3	0	44.3	0	44.3	0	52.4
74	1	1	70	0	0.9	0	0.9	0	3	1	2	3.5	3	0	20	0	0	0	0	1	0	0	0		2	0	88.3	0	88.3	0	88.3	0	88.3
75	2	1	53	0	6.6	1	1.1	0	3	1	2	6	3	7	25	0.28	4	0	0	1	1	1	0		2	0	63	0	63	0	63	0	63
76	1	2	40	0	0.9	0	0.7	0	3	1	2	6	3	2	22	0.091	2	0	0	1	1	1	0		2	0	109.9	0	109.9	0	109.9	0	109.9
77	1	2	62	0	4	0	0.9	0	2	0	2	3.8	3	0	20	0	0	0	0	0	1	2	0		2	0	93.9	0	93.9	0	93.9	0	93.9
78	1	1	71	0	8	1	1.9	0	1	0	1	8.5	3	1	31	0.032	1	0	0	0	0	1	0		2	0	109.7	0	109.7	0	109.7	0	109.7
79	1	2	48	0	1.5	0	0.9	0	2	0	2	7.9	3	0	75	0	0	0	0	1	0	1	0		0	0	68.2	0	68.2	0	68.2	0	77.2
80	2	2	34	0	3.8	0	1.7	0	2	0	2	4	3	0	17	0	0	0	0	0	0	1	0		2	0	70.8	0	70.8	0	70.8	0	69.1
81	1	1	61	0	6.5	1	0.9	0	2	0	2	6	3	1	15	0.067	1	0	0	1	0	1	0		2	0	92.8	0	92.8	0	92.8	0	92.8
82	2	2	63	0	4	0	0.9	0	2	0	2	3.2	3	1	31	0.032	1	0	0	0	0	0	0		2	0	47.7	0	47.7	0	47.7	0	57.5
83	1	1	66	0	0.9	0	0.9	0	2	0	1	7	3	0	25	0	0	0	0	1	0	0	0		2	0	61.5	0	61.5	0	61.5	0	71.7
84	1	1	55	0	4.3	0	0.9	0	2	0	1	4	3	0	24	0	0	0	0	0	0	0	0		2	0	105.2	0	105.2	0	105.2	0	105.2
85	1	1	59	0	3.7	0	0.9	0	2	0	1	5.7	3	0	38	0	0	0	0	0	0	0	0		2	0	60	0	60	0	60	0	71.5
86	2	1	65	0	2.9	0	1.1	0	3	1	2	3.5	3	0	23	0	0	0	0	0	1	1	0		2	0	50	0	50	0	50	0	61.7
87	2	1	61	0	1.4	0	1.4	0	2	0	1	4	3	0	25	0	0	0	0	0	0	0	0		2	0	40.1	0	40.1	0	40.1	0	52
88	1	1	68	0	2	0	0.9	0	2	0	2	4	3	0	24	0	0	0	0	0	0	0	0		0	0	44.5	0	44.5	0	44.5	0	56.5
89	1	2	32	0	1.6	0	2	0	1	0	2	5	3	0	50	0	0	0	1	0	0	0	0		2	0	43.1	0	43.1	0	43.1	0	55.2
90	1	2	65	0	16.3	1	1.3	0	2	0	2	4	3	0	17	0	0	0	0	0	0	1	0		2	0	104.8	0	104.8	0	104.8	0	104.8
91	1	2	67	0	1	0	0.9	0	2	0	1	5	3	1	24	0.042	1	0	0	0	0	0	0		2	0	107.3	0	107.3	0	107.3	0	107.3
92	1	2	49	0	2.2	0	0.9	0	2	0	2	5.2	3	0	22	0	0	0	0	1	1	1	0		2	0	64.2	0	64.2	0	64.2	0	77.1
93	1	2	59	0	0.9	0	0.9	0	2	0	2	4.2	3	0	19	0	0	0	0	0	0	1	0		2	0	43	0	43	0	43	0	56
94	1	1	63	0	0.9	0	0.7	0	2	0	2	5	3	0	18	0	0	0	0	0	0	2	0		2	0	108.7	0	108.7	0	108.7	0	108.7
95	1	1	48	0	6.6	1	1.4	0	2	0	2	5.5	3	0	27	0	0	0	0	0	0	0	0		2	0	62.7	0	62.7	0	62.7	0	76.1
96	1	1	60	0	5.6	1	2.5	0	2	0	2	6.5	3	0	39	0	0	0	0	0	0	0	0		2	0	63.5	0	63.5	0	63.5	0	77.1
97	1	2	75	0	3.3	0	2.3	0	2	0	2	4.5	3	0	22	0	0	0	0	0	1	0	0		2	0	79	0	79	0	79	0	79
98	1	2	61	0	1.2	0	1.7	0	2	0	1	4.5	3	0	40	0	0	0	0	0	0	0	0		0	0	37.2	0	37.2	0	37.2	0	51
99	1	2	65	0	1.4	0	0.9	0	2	0	2	3.5	3	10	21	0.476	4	0	0	0	1	1	0		2	0	48.5	0	48.5	0	48.5	0	48.5
100	1	1	59	0	4.1	0	2.7	0	2	0	2	4	3	0	22	0	0	0	0	1	0	2	0		2	0	98.2	0	98.2	0	98.2	0	98.2
101	1	2	61	0	2.5	0	1.5	0	2	0	2	7.5	3	3	22	0.136	2	0	0	0	0	0	0		2	0	68	0	68	0	68	0	68
102	1	2	56	0	2	0	0.9	0	2	0	2	5	3	0	27	0	0	0	0	0	0	0	0		2	0	71.3	0	71.3	0	71.3	0	87.2
103	1	1	64	0	4.2	0	1.9	0	2	0	2	2.3	3	1	33	0.03	1	0	0	0	0	1	0		2	0	73.9	0	73.9	0	73.9	0	90.7
104	1	1	74	0	4.8	0	2	0	2	0	2	7	3	0	17	0	0	0	0	0	0	2	0		0	0	51.4	0	51.4	0	51.4	0	70.6
105	1	1	65	0	10.2	1	1.6	0	3	1	2	3	3	2	81	0.025	2	0	0	1	1	0	0		2	0	89.6	0	89.6	0	89.6	0	89.6
106	1	1	68	0	2	0	0.9	0	2	0	1	8.5	3	0	15	0	0	0	0	0	0	2	0		2	0	97.8	0	97.8	0	97.8	0	97.8
107	1	1	67	0	1.1	0	0.9	0	2	0	2	2.2	3	0	16	0	0	0	0	1	0	0	0		2	0	65.4	0	65.4	0	65.4	0	88.5
108	1	2	56	1	0.9	0	0.8	0	2	0	2	11	3	0	89	0	0	0	0	0	0	1	0		2	0	24.2	0	24.2	0	24.2	0	48
109	1	2	66	0	2.4	0	0.9	0	1	0	2	4	3	0	19	0	0	0	0	0	0	0	0		2	0	76.2	0	76.2	0	76.2	0	76.2
110	1	1	68	0	4.9	0	2.8	0	2	0	2	3.7	3	0	37	0	0	0	0	0	0	0	0		2	0	26.7	0	26.7	0	26.7	0	52.5
111	1	1	57	0	4.8	0	0.9	0	2	0	2	5.5	3	1	20	0.05	1	0	0	1	1	2	0		2	0	79.7	0	79.7	0	79.7	0	79.7
112	1	2	79	0	1.6	0	2.1	0	3	1	2	3.3	3	0	16	0	0	0	0	1	0	0	0		0	0	48.7	0	48.7	0	48.7	0	75.9
113	1	1	42	0	3	0	1.9	0	2	0	2	5	3	2	28	0.071	2	0	0	0	0	1	0		2	0	53	0	53	0	53	0	82.3
114	1	1	71	0	0.9	0	0.9	0	2	0	2	3	3	1	29	0.034	1	0	0	1	0	0	0		2	0	86.2	0	86.2	0	86.2	0	86.2
115	1	2	52	0	44.4	1	0.9	0	3	1	2	4.9	3	2	23	0.087	2	0	0	1	1	0	0		2	0	69.5	0	69.5	0	69.5	0	69.5
116	1	2	40	0	1.6	0	0.9	0	2	0	2	5	3	2	44	0.045	2	0	0	0	1	0	0		2	0	65.2	0	65.2	0	65.2	0	65.2
117	1	2	62	0	3.1	0	0.9	0	1	0	1	5	3	1	70	0.014	1	0	0	0	0	0	0		2	0	68.8	0	68.8	0	68.8	0	68.8
118	1	2	59	0	2	0	0.9	0	2	0	2	4	3	1	24	0.042	1	0	0	0	1	0	0		2	0	58.4	0	58.4	0	58.4	0	58.4
119	1	1	74	0	1.1	0	0.9	0	2	0	2	4.4	3	0	30	0	0	0	0	0	0	0	0		2	0	58.2	0	58.2	0	58.2	0	58.2
120	1	1	63	0	3.4	0	1.8	0	2	0	1	6.5	3	0	10	0	0	0	0	1	0	3	0		2	0	52.7	0	52.7	0	52.7	0	52.7
121	1	2	66	0	18.4	1	1.2	0	2	0	2	4	3	0	23	0	0	0	0	1	0	3	0		2	0	44.1	0	44.1	0	44.1	0	44.1
122	1	2	42	0	4.9	0	0.6	0	2	0	2	4.5	3	0	33	0	0	0	0	1	1	1	0		2	0	52.6	0	52.6	0	52.6	0	52.6
123	1	2	72	0	8.8	1	3.9	0	2	0	2	5	3	1	20	0.05	1	0	0	1	1	2	0		2	0	55.4	0	55.4	0	55.4	0	55.4
124	2	2	50	0	1.2	0	0.9	0	1	0	2	5	2	1	30	0.033	1	0	0	0	1	0	0		2	0	37.8	0	37.8	0	37.8	0	37.8
125	1	1	63	0	0.9	0	1	0	1	0	2	1.7	2	1	31	0.032	1	0	0	1	1	0	0		2	0	44.1	0	44.1	0	44.1	0	44.1
126	1	1	77	0	2.6	0	1	0	1	0	1	4.3	2	4	13	0.3	3	0	0	0	0	0	0		2	0	12	0	12	0	12	0	12
127	1	1	52	0	4.1	0	2.3	0	1	0	2	3.5	2	1	22	0.045	1	0	0	1	0	0	0		2	0	89.4	0	89.4	0	89.4	0	89.4
128	1	1	54	0	2.8	0	2.8	0	2	0	1	2.5	2	5	20	0.25	3	0	0	1	0	0	0		2	0	72.9	0	72.9	0	72.9	0	72.9
129	1	2	57	0	1.8	0	0.9	0	2	0	1	2.7	2	1	52	0.019	1	0	0	0	0	0	0		2	0	41.2	0	41.2	0	41.2	0	53.4
130	1	1	76	0	1.6	0	1.4	0	1	0	1	1.3	1	2	33	0.061	2	0	0	0	0	0	0		2	0	41.6	0	41.6	0	41.6	0	41.6
131	1	1	69	0	2.3	0	1.6	0	1	0	1	2.7	1	1	20	0.05	1	0	0	1	0	0	0		0	0	64.8	0	64.8	0	64.8	0	74
132	2	2	48	0	1.6	0	1.2	0	1	0	1	1.1	1	1	53	0.019	1	0	1	1	0	0	0		2	0	56	0	56	0	56	0	60.1
133	1	1	59	0	1.5	0	0.9	0	1	0	1	1.7	1	1	13	0.077	1	0	0	0	0	0	0		2	0	76.8	0	76.8	0	76.8	0	76.8
134	2	1	57	0	0.9	0	0.9	0	1	0	2	2.2	1	1	23	0.043	1	0	0	1	0	0	0		2	0	45.5	0	45.5	0	45.5	0	59.2
135	1	2	44	0	0.9	0	0.9	0	1	0	1	1.8	1	2	19	0.105	2	0	0	1	0	0	0		2	0	58.7	0	58.7	0	58.7	0	75
136	1	1	73	0	1.4	0	0.9	0	1	0	1	1	1	2	7	0.286	2	0	0	0	0	0	0		2	0	91	0	91	0	91	0	91
137	1	2	73	0	17.2	1	1.8	0	2	0	2	7.5	4	2	12	0.167	2	0	1	1	0	1	1	50.4	0	0	114.5	1	38.6	1	38.6	0	114.5
138	1	1	46	0	1.8	0	1.8	0	2	0	2	4.3	5	5	14	0.357	3	0	1	1	1	0	1	55.8	2	0	14.4	1	6.6	1	6.6	1	14.4
139	1	2	63	0	0.9	0	0.5	0	2	0	1	6	5	2	22	0.091	2	0	0	1	0	2	1	45	2	0	107.6	0	105.5	0	107.6	0	107.6
140	1	1	70	0	1.5	0	1.9	0	1	0	1	3	2	1	19	0.053	1	0	0	0	0	0	1	50.4	2	0	50.6	0	50.6	0	50.6	0	50.6
141	1	1	69	1	2.1	0	0.9	0	3	1	2	3.8	2	1	13	0.077	1	0	0	0	0	2	1	50.4	2	0	89.2	0	89.2	1	89.2	1	89.2
142	2	1	50	0	1.8	0	1	0	1	0	2	2.2	2	1	24	0.042	1	0	0	0	0	4	1	50.4	2	0	48.7	0	48.7	0	48.7	0	48.7
143	2	1	58	0	1.4	0	3.5	0	1	0	2	0.2	1	2	20	0.1	2	0	0	0	0	0	1	50.4	2	0	57.7	0	57.7	0	57.7	0	58.9
144	1	1	56	0	1.7	0	1.4	0	2	0	2	3.8	3	3	28	0.107	2	0	0	1	0	0	1	50.4	2	0	50.9	1	35.8	1	35.8	0	50.9
145	1	1	47	0	0.9	0	0.9	0	3	1	2	4.2	3	4	28	0.143	3	0	0	1	1	1	1	50.4	2	0	87.3	1	46.7	1	46.7	0	87.3
146	2	2	75	0	12.6	1	0.9	0	3	1	2	3	3	4	26	0.154	3	0	0	1	1	1	1	50.4	2	0	34.9	1	14.9	1	14.9	1	34.9
147	2	1	61	0	3.9	0	2.2	0	2	0	2	7	3	18	31	0.581	4	1	1	1	1	0	1	50.4	2	0	39.6	1	3.4	1	3.4	1	39.6
148	1	2	59	0	9.3	1	2.4	0	2	0	2	5.5	3	29	76	0.382	4	0	1	1	0	0	1	50.4	2	0	37	1	10.5	1	10.5	1	37
149	1	1	61	0	5.6	1	0.9	0	3	1	2	4	3	4	14	0.286	3	0	0	1	1	0	1	50.4	2	0	86.7	1	18.1	1	18.1	0	86.7
150	1	2	71	0	5.9	1	2.5	0	2	0	2	4	3	2	20	0.1	2	1	1	1	0	0	1	50.4	2	0	16.7	1	7.8	1	7.8	1	16.7
151	1	1	48	0	2.8	0	0.9	0	2	0	2	3.3	3	6	14	0.429	3	0	1	0	0	0	1	50.4	2	0	81.3	1	4.3	1	4.3	0	81.3
152	1	1	59	0	6.4	1	1.3	0	2	0	1	6	3	2	26	0.077	2	0	0	1	0	2	1	50.4	2	0	106.6	1	28.3	1	28.3	0	111
153	1	1	58	0	2.5	0	1.5	0	2	0	2	9	3	38	54	0.704	4	1	1	1	1	0	1	55.8	2	0	11.5	1	3.4	1	3.4	1	11.5
154	2	1	62	0	1.2	0	1.3	0	2	0	2	5	3	0	43	0	0	0	1	0	0	0	1	50.4	2	0	50.2	0	50.2	0	50.2	0	50.2
155	1	1	36	1	34.6	1	2.9	0	3	1	2	7.5	3	8	48	0.167	4	0	0	1	1	1	1	50.4	2	0	46.8	0	46.8	0	46.8	0	46.8
156	1	1	62	1	13	1	4.5	0	2	0	2	2.8	3	0	19	0	0	0	0	1	0	0	1	50.4	2	0	52.8	0	52.8	0	52.8	0	52.8
157	1	1	48	1	2.3	0	1	0	2	0	2	5	3	8	34	0.235	4	0	0	1	1	0	1	50.4	2	0	49.5	0	49.5	0	49.5	0	49.5
158	1	2	69	0	1.4	0	1.1	0	3	1	1	5	3	1	26	0.038	1	0	1	0	0	0	1	50.4	2	0	48	0	48	0	48	0	48
159	1	1	63	0	1.5	0	0.9	0	2	0	2	4.5	3	4	39	0.103	3	0	1	1	1	1	1	50.4	2	0	50.8	0	50.8	0	44.5	0	50.8
160	1	1	55	0	0.9	0	1.2	0	2	0	2	3.4	3	2	22	0.091	2	0	0	1	0	1	1	50.4	2	0	50.6	0	50.6	0	50.6	0	50.6
161	1	1	53	0	2.25	0	1.4	0	3	1	2	8	3	2	27	0.074	2	0	0	1	0	1	1	50.4	2	0	91.6	0	91.6	0	91.6	0	91.6
162	1	1	63	1	1.4	0	1.4	0	1	0	1	7.8	3	3	25	0.12	2	1	0	1	1	1	1	50.4	2	0	81.2	0	81.2	0	81.2	0	81.2
163	1	1	41	0	0.9	0	0.5	0	2	0	1	8	3	0	34	0	0	0	0	0	0	2	1	50.4	2	0	97.5	0	97.5	0	97.5	0	97.5
164	2	2	54	0	7.6	1	0.9	0	2	0	2	6	3	7	48	0.146	4	0	0	1	0	1	1	50.4	2	0	47.9	0	47.9	0	47.9	0	47.9
165	1	1	44	0	0.9	0	0.9	0	2	0	1	4	3	0	19	0	0	0	1	1	0	0	1	50.4	2	0	94.9	0	94.9	0	94.9	0	124.2
166	1	1	55	0	2	0	0.9	0	3	1	2	5	3	0	16	0	0	0	0	0	0	2	1	50.4	2	0	25	0	25	0	25	0	124.9
167	2	1	71	0	25.9	1	2.7	0	3	1	2	6.2	3	4	24	0.167	3	0	1	1	1	1	1	50.4	0	0	30	0	30	0	30	0	61.9
168	1	2	54	0	9.9	1	0.9	0	3	1	2	3.5	3	5	27	0.185	3	0	1	1	0	1	1	50.4	2	0	79.3	0	79.3	0	79.3	0	79.3
169	1	2	73	0	3	0	1.3	0	2	0	1	6	3	10	29	0.345	4	1	0	1	0	0	1	50.4	2	0	75.7	0	75.7	0	75.7	0	111.1
170	1	1	69	0	35.5	1	2.4	0	2	0	2	5.5	3	10	27	0.37	4	0	0	1	0	1	1	50.4	2	0	48.9	0	48.9	0	48.9	0	54.7
171	1	1	77	0	5	0	0.9	0	3	1	1	8.5	3	6	17	0.353	3	0	0	1	1	1	1	50.4	2	0	34.3	0	34.3	0	34.3	0	34.3
172	1	1	62	0	1.8	0	1.1	0	2	0	2	3.5	3	2	39	0.051	2	0	0	1	0	1	1	50.4	2	0	57.7	0	57.7	0	57.7	0	57.7
173	2	1	54	1	2	0	2	0	3	1	2	8	3	2	30	0.067	2	0	0	0	0	0	1	50.4	2	0	70.1	0	70.1	0	70.1	0	70.2
174	1	1	54	0	0.9	0	0.9	0	2	0	1	4	3	0	13	0	0	0	0	0	0	1	1	50.4	2	0	121.5	0	121.5	0	121.5	0	121.5
175	1	2	45	0	1	0	1.8	0	2	0	2	6	3	0	14	0	0	0	0	0	1	0	1	50.4	2	0	115.8	0	115.8	0	115.8	0	115.8
176	1	1	67	0	1.8	0	0.9	0	2	0	2	5	3	4	65	0.062	3	0	0	1	1	2	1	50.4	2	0	51.9	0	51.9	0	51.9	0	51.9
177	2	2	58	0	1.5	0	0.6	0	2	0	1	7	3	1	23	0.043	1	0	0	1	0	0	1	50.4	2	0	69.1	0	69.1	0	69.1	0	69.1
178	1	1	58	0	0.9	0	0.9	0	2	0	2	1.5	3	0	22	0	0	0	0	1	0	2	1	50.4	2	0	83.5	0	83.5	0	83.5	0	83.5
179	1	1	72	0	0.9	0	0.9	0	3	1	1	6.5	3	0	22	0	0	0	0	1	0	0	1	50.4	2	0	117.5	0	117.5	0	117.5	0	117.5
180	2	1	45	0	3.4	0	1.3	0	3	1	2	5	3	2	26	0.077	2	0	0	1	0	0	1	50.4	2	0	62	0	62	0	62	0	65.6
181	1	1	64	0	2.9	0	1.8	0	1	0	2	2.7	3	0	18	0	0	0	0	0	0	0	1	50.4	2	0	66.9	0	66.9	0	66.9	0	78.9
182	1	2	54	0	0.9	0	0.8	0	3	1	2	2.5	3	0	12	0	0	0	0	0	0	1	1	50.4	2	0	101.9	0	101.9	0	101.9	0	101.9
183	1	2	48	0	0.9	0	0.9	0	2	0	2	5.3	3	0	32	0	0	0	0	0	0	0	1	50.4	2	0	57.9	0	57.9	0	57.9	0	73.6
184	1	1	69	0	2.7	0	0.9	0	3	1	2	4.9	3	0	31	0	0	0	0	0	0	1	1	50.4	2	0	59.7	0	59.7	0	59.7	0	75.9
185	1	1	65	0	0.9	0	0.9	0	2	0	1	1.6	3	3	13	0.231	2	0	0	1	0	2	1	50.4	2	0	102.4	0	102.4	0	102.4	0	102.4
186	1	1	74	1	1	0	0.5	0	2	0	1	2.3	3	0	13	0	0	0	0	0	0	0	1	50.4	2	0	61.5	0	61.5	0	61.5	0	78.2
187	1	2	45	0	7.1	1	0.9	0	2	0	2	6	3	1	37	0.027	1	0	1	0	0	0	1	50.4	2	0	63.9	0	63.9	0	63.9	0	82.3
188	2	1	57	1	40	1	4.4	0	2	0	2	8	5	0	29	0	0	0	0	0	0	0	1	45	2	1	9.5	0	30.1	1	9.5	1	30.1
189	1	1	62	1	2.86	0	0.9	0	2	0	2	9	3	0	19	0	0	0	0	0	1	1	1	50.4	2	0	101	1	15.4	1	15.4	1	101
190	1	1	68	0	4.2	0	1.6	0	2	0	2	6.8	3	6	40	0.15	3	0	0	1	1	0	1	50.4	2	0	47	0	47	0	47	0	47
